# Supplementary material
Source: PubMed Central journal article supplement (PMC3485957)

Table S1. Primers used to generate full-length and truncated forms of SaGH74A and SaGH74B.

| Primers                                                                                                            | Restriction sites in primers | Gene            | region    | Recombinant protein              |
|--------------------------------------------------------------------------------------------------------------------|------------------------------|-----------------|-----------|----------------------------------|
| F1, 5'- <u>CATATGCGAAGAACCCGCATCTTCACGGCC</u> -3'<br>R1, 5'- <u>AAGCTTTCAGGCGACCGTGCAGTTCTGACC</u> -3'             | NdeI/HindIII                 | <i>sav_1856</i> | 1-2649    | SaGH74A                          |
| F1, 5'- <u>CATATGCGAAGAACCCGCATCTTCACGGCC</u> -3'<br>R2, 5'- <u>AAGCTTTCAGCCCCGCGGTGTCGCCGTAGACGAT</u> -3'         | NdeI/HindIII                 | <i>sav_1856</i> | 1-2292    | the catalytic domain of SaGH74A  |
| F2, 5'- <u>CCATGGGCGCCTGCACGGTGACATACAGGATCA</u> -3'<br>R3,<br>5'- <u>AAGCTTGCGACCGTGCAGTTCTGACCGCCGAGTTTG</u> -3' | NcoI/HindIII                 | <i>sav_1856</i> | 2328-2649 | CBM2 (C-terminal His-tag fusion) |
| F2, 5'- <u>CCATGGGCGCCTGCACGGTGACATACAGGATCA</u> -3'<br>R4,<br>5'- <u>AAGCTTTCAGGCGACCGTGCAGTTCTGACCGCCGAG</u> -3' | NcoI/HindIII                 | <i>sav_1856</i> | 2328-2649 | CBM2                             |
| BF1, 5'- <u>CATATGCGCACGCCCCGCCCCGAGCAGACGA</u> -3'<br>BR1, 5'- <u>AAGCTTTCAGACCGGCTCCCCGTACTGGAT</u> -3'          | NdeI/HindIII                 | <i>sav_2574</i> | 1-2220    | SaGH74B                          |

Table S2. The homologues of the catalytic domains and the CBM of *Streptomyces avermitilis* xyloglucanases.

| Organism         | Enzyme                                 | GenBank accession number                                 | Identity (%) and similarity (%) | 3D-Structure (PDB code) | GH family | CBM family | References |            |
|------------------|----------------------------------------|----------------------------------------------------------|---------------------------------|-------------------------|-----------|------------|------------|------------|
| Catalytic domain |                                        |                                                          |                                 |                         |           |            |            |            |
| SaGH74 A         | <i>Streptomyces avermitilis</i>        | Xyloglucanase (SaGH74A)                                  | BAC69567                        |                         |           | GH74       | CBM2       | this study |
|                  | <i>Streptomyces coelicolor</i> A3(2)   | Xyloglucanase (Sco6545)                                  | CAA20642                        | 83 and 91               |           | GH74       | CBM2       | 1          |
|                  | <i>Thermobifida fusca</i> YX           | Xyloglucanase (Xeg74)                                    | AAZ55647                        | 61 and 76               | 1WVO      | GH74       |            | 2          |
|                  | <i>Clostridium thermocellum</i>        | Xyloglucanase (Xgh74A)                                   | CAE51306                        | 53 and 67               | 2CN2      | GH74       |            | 3, 4       |
|                  | <i>Phanerochaete chrysosporium</i> K-3 | Xyloglucanase (Xgh74B)                                   | BAF95189                        | 49 and 64               |           | GH74       | CBM1       | 5          |
| SaGH74 B         | <i>Streptomyces avermitilis</i>        | Xyloglucanase (SaGH74B)                                  | BAC70285                        | 42 and 55               |           | GH74       | CBM2       | this study |
| CBM              |                                        |                                                          |                                 |                         |           |            |            |            |
|                  | <i>Streptomyces avermitilis</i>        | Xyloglucanase (SaGH74A)                                  | BAC69567                        |                         |           | GH74       | CBM2       | this study |
|                  | <i>Cellulomonas fimi</i>               | Endo- $\beta$ -1,4-xylanase                              | AEA30147                        | 49 and 65               | 1EXG      | GH10       | CBM2       | 6          |
|                  | <i>Clostridium cellulovorans</i>       | Endo- $\beta$ -1,4-glucanase/Endo- $\beta$ -1,4-xylanase | AAA23233                        | 40 and 60               | 3NDY      | GH5        | CBM2       | 7          |

## References

1. **Enkhbaatar B, et al.** 2012. Identification and characterization of a xyloglucan-specific family 74 glycosyl hydrolase from *Streptomyces coelicolor* A3(2). *Appl. Environ. Microbiol.* **78**:607-611.
2. **Irwin DC, Cheng M, Xiang B, Rose JK, Wilson DB.** 2003. Cloning, expression and characterization of a family-74 xyloglucanase from *Thermobifida fusca*. *Eur. J. Biochem.* **270**:3083-3091.
3. **Martinez-Fleites, et al.** 2006. Crystal Structures of *Clostridium thermocellum* Xyloglucanase, Xgh74A, reveal the structural basis for xyloglucan recognition and degradation. *J. Biol. Chem.* **281**:24922-24933.
4. **Zverlov VV, Schantz N, Schmitt-Kopplin P, Schwarz WH.** 2005. Two new major subunits in the cellulosome of *Clostridium thermocellum*: xyloglucanase Xgh74A and endoxylanase Xyn10D. *Microbiology* **151**:3395-3401.
5. **Ishida T, Yaoi K, Hiyoshi A, Igarashi K, Samejima M.** 2007. Substrate recognition by glycoside hydrolase family 74 xyloglucanase from the basidiomycete *Phanerochaete chrysosporium*. *FEBS J.* **274**:5727-5736.
6. **Ong E, Gilkes NR, Miller RC Jr, Warren RA, Kilburn DG.** 1993. The cellulose-binding domain (CBDcex) of an exoglucanase from *Cellulomonas fimi*: production in *Escherichia coli* and characterization of the polypeptide. *Biotechnol. Bioengineer.* **42**:401-409.
7. **Foong F, Roi D.** 1992. Characterization and comparison of *Clostridium cellulovorans* endoglucanases-xylanases EngB and EngD hyperexpressed in *Escherichia coli*. *J. Bacteriol.* **174**:1403-1409.

Fig. S1

Schematic of the molecular architecture of SaGH74A and SaGH74B.  
The modules in the enzymes are as follows: GH74, glycoside hydrolase family 74 catalytic module; CBM2, carbohydrate-binding module family 2. The primer sets used for the cloning are shown in Table S1.

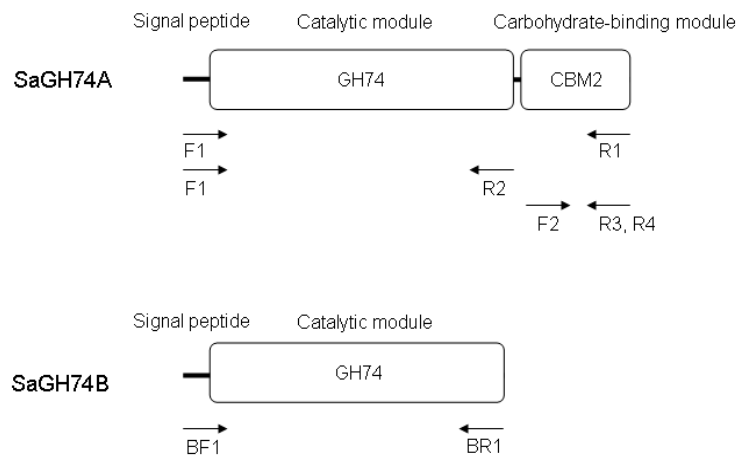

Fig. S2

SDS-PAGE analysis of purified recombinant enzymes.  
Lane 1, molecular mass marker; lane 2, purified SaGH74A; lane 3, purified SaGH74B.  
Approximately 1  $\mu\text{g}$  of each sample was separated on 10% wt/vol polyacrylamide gel.

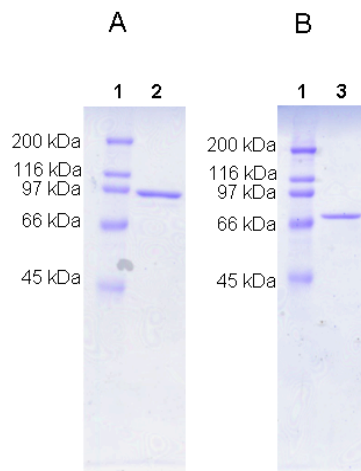

Fig. S3

HPAEC-PAD analysis of xyloglucan-derived oligosaccharides used in this study.

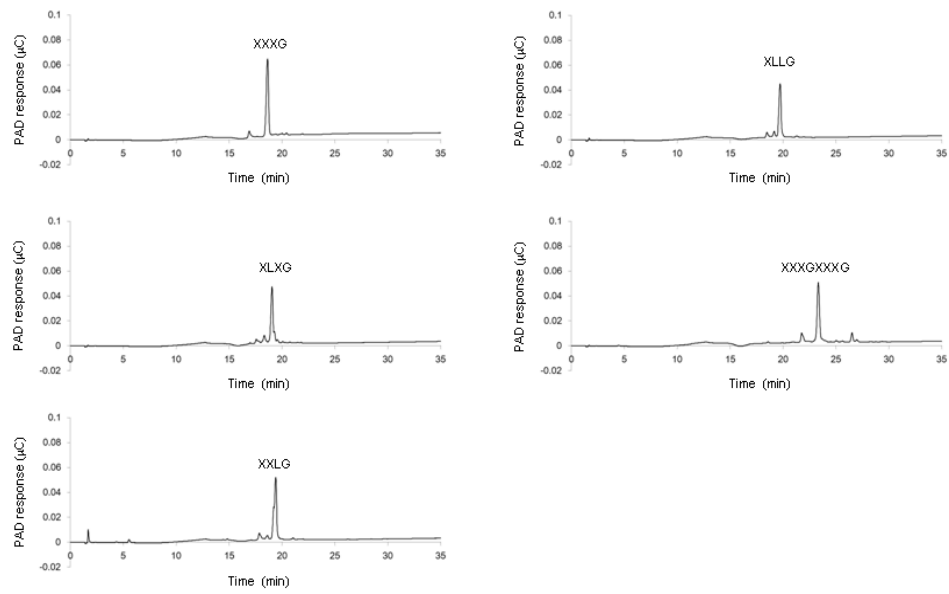

Fig. S4

Binding of SaGH74A.

The protein was incubated with insoluble polysaccharides, including avicel (crystalline cellulose) (A), insoluble oat spelt xylan ( $\beta$ -1,4-xylan) (B), insoluble birchwood xylan ( $\beta$ -1,4-xylan) (C), chitin (D), lichenan ( $\beta$ -1,3- $\beta$ -1,4-glucan) (E), pachyman ( $\beta$ -1,3-glucan) (F), and ivory nut mannan ( $\beta$ -1,4-mannan) (G). After centrifugation, the proteins in supernatant (lane 2) and precipitate (lane 3) were analyzed by SDS-PAGE. Lane 1, molecular mass marker.

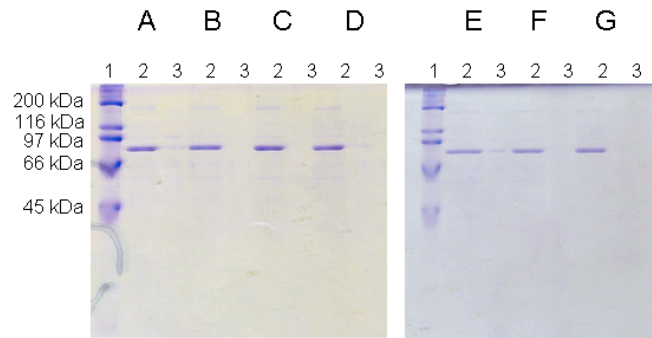

Supplement: AEM.01762-12_zam999103821so1.pdf [file AEM.01762-12_zam999103821so1.pdf]
